# Supplementary material
Source: Research Square preprint supplement (doi:10.21203/rs.3.rs-10305726/v1)
Supplement: Supplementary file 1 [file ff9eba9a575aeb4f0635c123.docx]

**TRIPOD Checklist for Prediction Model Development (without external validation)**

| **Item** | **Section/Topic** | **Item description** | **Location in manuscript** |
| --- | --- | --- | --- |
| **Title and abstract** |  |  |  |
| 1 | Title | Identify the study as developing a prediction model. | Title page |
| 2 | Abstract | Summarise objectives, methods, key results, and interpretation. | Summary (abstract) |
| **Introduction** |  |  |  |
| 3a | Background | Explain the clinical need for the prediction model. | Introduction – paragraphs 1‑2 |
| 3b | Objectives | State the study objectives, including the prediction model. | Introduction – final paragraph |
| **Methods** |  |  |  |
| 4a | Source of data | Describe the study design, setting, and data collection period. | Methods – Study Design and Setting |
| 4b | Key dates | Specify dates of data collection. | Methods – Study Design and Setting |
| 5a | Participants | Describe eligibility criteria and sampling methods. | Methods – Participants |
| 5b | Participants | Describe any exclusion criteria. | Methods – Participants |
| 6a | Outcome | Clearly define the outcome that is being predicted. | Methods – Outcomes |
| 6b | Outcome | Provide details of how the outcome was assessed. | Methods – Outcomes |
| 7a | Predictors | Define all candidate predictors. | Methods – Variables and Measurements |
| 7b | Predictors | Explain how predictors were measured. | Methods – Variables and Measurements |
| 8 | Sample size | Explain how the study size was determined (e.g., events‑per‑variable, power analysis). | Methods – Participants (post‑hoc power) |
| 9 | Missing data | Describe how missing data were handled. | Methods – Data Quality and Missing Data |
| 10a | Analysis (model development) | Specify the type of model (e.g., logistic regression, machine learning). | Methods – Statistical Analysis (Elastic Net, Random Forest) |
| 10b | Analysis (model development) | Describe the predictor selection method (e.g., regularisation). | Methods – Statistical Analysis (Elastic Net) |
| 10c | Analysis (model development) | Describe how the model was fitted (e.g., cross‑validation). | Methods – Statistical Analysis (10‑fold cross‑validation) |
| 11 | Predictors | Report the final predictors in the model. | Results – Prognostic Model for Decannulation Success (Table 5) |
| 12 | Model performance | Report measures of model performance (discrimination, calibration). | Results – Prognostic Model for Decannulation Success |
| 13a | Model presentation | Present the full prediction model (e.g., regression coefficients). | Table 5 and Supplementary Material 6 |
| 13b | Model presentation | Explain how to use the model. | Not applicable (model is presented for reference) |
| 14 | Model updating | Describe any internal validation methods (e.g., bootstrap). | Methods – Statistical Analysis (bootstrap optimism correction) |
| **Results** |  |  |  |
| 15a | Participants | Describe the flow of participants (e.g., numbers, exclusions). | Results – Cohort Characteristics; Supplementary Material 5 |
| 15b | Participants | Describe the characteristics of the participants. | Table 1 |
| 15c | Participants | Describe the number of participants with missing data. | Methods – Data Quality and Missing Data |
| 16 | Model development | Report the number of events and candidate predictors. | Results – Prognostic Model for Decannulation Success |
| 17a | Model performance | Report the model’s discrimination (AUC‑ROC). | Results – Prognostic Model for Decannulation Success |
| 17b | Model performance | Report the model’s calibration (intercept, slope, plot). | Results – Prognostic Model for Decannulation Success; Figure 3 |
| 18 | Model presentation | Present the final model (coefficients). | Table 5 |
| **Discussion** |  |  |  |
| 19 | Limitations | Discuss the study’s limitations. | Discussion – Strengths and limitations |
| 20 | Interpretation | Give an overall interpretation of the results. | Discussion – Overview and Conclusion |
| 21 | Implications | Discuss the clinical implications. | Discussion – Implications for practice |
| **Other information** |  |  |  |
| 22a | Supplementary information | Provide details of any supplementary material. | Throughout (Supplementary Materials 1‑6, Figures S1‑S5) |
| 22b | Funding | Disclose funding sources. | Declarations – Funding |
